# Supplementary material
Source: PubMed Central journal article supplement (PMC3040000)
Supplement: 97320630005021S1.pdf [file 97320630005021S1.pdf]

### Supplementary material:

$$N_c = n_1/F_1 + n_2/F_2 + n_3/F_3 + n_4/F_4 + n_5/F_5 + n_6/F_6$$

Where  $F_1, F_2, F_3$  etc. are the average homozygosity estimates for Synonymous Family (SF) type 'i', and  $n_1, n_2, n_3$  etc. are the contributions of each of the SF type. Average ENC was calculated for each species by taking average value for each protein coding gene.

**Table 1:** Variation in size, GC content and number of proteins, t-RNA and r-RNA coding genes in the mt-DNA of different species

| Species                        | Size (bp) | GC content (%) | No. of Proteins | rRNA Species | tRNA Species |
|--------------------------------|-----------|----------------|-----------------|--------------|--------------|
| <i>Rhabdocalypus dawsoni</i>   | 18587     | 34             | 14              | 2            | 21           |
| <i>Pista cristata</i>          | 15894     | 32             | 13              | 2            | 20           |
| <i>Brugia malayi</i>           | 13657     | 24             | 12              | 2            | 22           |
| <i>Caenorhabditis elegans</i>  | 13794     | 24             | 12              | 2            | 22           |
| <i>Aedes aegypti</i>           | 16655     | 21             | 13              | 2            | 22           |
| <i>Drosophila melanogaster</i> | 19517     | 18             | 13              | 2            | 22           |
| <i>Bombyx mori</i>             | 15643     | 19             | 13              | 2            | 22           |
| <i>Manduca sexta</i>           | 15516     | 18             | 13              | 2            | 22           |
| <i>Apis mellifera</i>          | 16343     | 15             | 13              | 2            | 22           |
| <i>Oxya chinensis</i>          | 15443     | 24             | 13              | 2            | 22           |
| <i>Periplaneta fuliginosa</i>  | 14996     | 25             | 13              | 2            | 22           |
| <i>Tribolium castaneum</i>     | 15881     | 28             | 13              | 2            | 22           |
| <i>Mytilus edulis</i>          | 16740     | 38             | 13              | 2            | 21           |
| <i>Sepia officinalis</i>       | 16163     | 27             | 13              | 2            | 22           |
| <i>Xenopus laevis</i>          | 17553     | 37             | 13              | 2            | 22           |
| <i>Homo sapiens</i>            | 16567     | 44             | 13              | 2            | 22           |
